# Supplementary material for: Stroke Recurrence in First-Ever Symptomatic Carotid Web: A Cohort Study
Source: PubMed Central journal article supplement — J Stroke. 2021 May 31;23(2):253–62. doi: 10.5853/jos.2020.05225 (PMC8189848; doi:10.5853/jos.2020.05225), 2021-05-31
Supplement: jos-2020-05225-suppl.pdf [file jos-2020-05225-suppl.pdf]

**Supplementary Table 1.** Cumulative recurrent CIE rates

|                                                  | Cumulative recurrent CIE |          |           |           |           |           |
|--------------------------------------------------|--------------------------|----------|-----------|-----------|-----------|-----------|
|                                                  | 30-Day                   | 1-Year   | 2-Year    | 3-Year    | 5-Year    | 10-Year   |
| CIE for the whole follow-up period               | 4 (4.4)                  | 9 (10.1) | 15 (17.7) | 17 (20.4) | 18 (23.5) | 19 (49.0) |
| CIE for the period under medical treatment alone | 4 (4.4)                  | 9 (10.8) | 15 (19.8) | 17 (23.2) | 18 (27.3) | 19 (63.6) |
| According to sex                                 |                          |          |           |           |           |           |
| Males                                            | 1 (2.6)                  | 6 (16.9) | 10 (29.4) | 11 (33.1) | 12 (42.7) | 13 (71.3) |
| Females                                          | 3 (5.8)                  | 3 (5.8)  | 5 (11.7)  | 6 (14.8)  | 6 (14.8)  | 6 (14.8)  |
| According to the presence of SCI                 |                          |          |           |           |           |           |
| SCI+                                             | 2 (31.4)                 | 3 (48.6) | 5 (82.9)  | 5 (82.9)  | 5 (82.9)  | 5 (82.9)  |
| SCI-                                             | 2 (2.4)                  | 6 (8.1)  | 10 (14.4) | 12 (18.1) | 13 (22.4) | 14 (61.2) |
| IS for the period under medical treatment alone  | 4 (4.4)                  | 9 (10.8) | 14 (18.3) | 15 (20.0) | 15 (20.0) | 16 (40.0) |

Values are presented as number (%). All recurrent CIEs occurred ipsilateral to the first-ever CIE. CIE, cerebral ischemic event; SCI, silent cerebral infarction; IS, ischemic stroke.

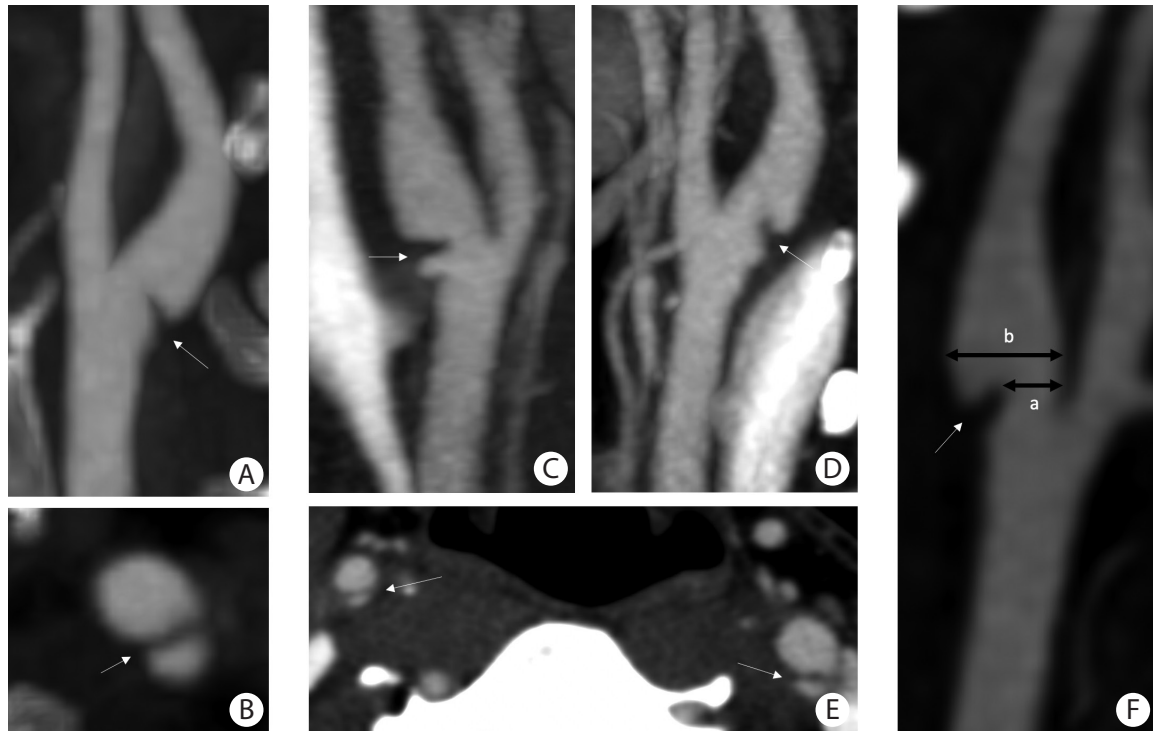

**Supplementary Figure 1.** Features of carotid web (CaW) on computed tomography angiography. CaW seen as a regular and thin shelf-like defect at the origin of the left carotid bulb (white arrow) on sagittal view (A), and the corresponding linear defect (white arrow) splitting the lumen artery on axial plane (B). Images of a patient with bilateral CaW (white arrows). Right asymptomatic CaW (C) and left symptomatic CaW (D) on sagittal view with the corresponding axial plane (E) that shows bilateral CaWs. Carotid bulb stenosis expressed in percentage was measured with the European Carotid Surgery Trial method:  $[(b - a) / b] \times 100$  (F).
